1 **Differential requirement of *nanos* homologs in the germline suggests the evolutionary path**  
2 **toward an inheritance mechanism of primordial germ cell formation in the silkworm *Bombyx***

3

4 Hajime Nakao\*, Yoko Takasu

5

6 Insect Design Technology group, Division of Insect Advanced Technology, Institute of  
7 Agrobiological Sciences, National Agriculture and Food Research Organization (NARO), 1-2  
8 Oowashi, Tsukuba, Ibaraki 305-8634, Japan

9 Silk Materials Research Group, Division of Silk-Producing Insect Biotechnology, Institute of  
10 Agrobiological Sciences, National Agriculture and Food Research Organization (NARO), 1-2  
11 Oowashi, Tsukuba, Ibaraki 305-8634, Japan

12

13 \*Author for Correspondence

14 Present Address: International Cooperation Team, International Relations Section, Department of  
15 Research Management, Strategic Planning Headquarters, National Agriculture and Food Research  
16 Organization (NARO), 3-1-1 Kannondai, Tsukuba, Ibaraki 305-8517, Japan

17 Tel.: +81-29-838-6967, E-mail: [nakaoh@naro.affrc.go.jp](mailto:nakaoh@naro.affrc.go.jp)

18

19 Key words: *Bombyx*, lepidopteran insect, PGC specification, *nanos*, segmentation

20 **Abstract**

21 The lepidopteran insect *Bombyx mori* possesses unique embryogenesis characteristics among insects.  
22 *nanos* (*nos*) has conserved functions in metazoan primordial germ cell formation. *Bombyx* possesses  
23 four *nos* genes (M, N, O, P), a unique feature found in lepidopterans examined so far. Of these,  
24 maternal *nosO* mRNA exhibits a localization pattern: it may act as a primordial germ cell (PGC)  
25 determinant. A previous knock-out experiment of *nosO* showed that this localized mRNA is  
26 dispensable for PGC formation in laboratory environment and has limited involvement in PGC  
27 specification. This study examined whether other *nos* genes act redundantly with *nosO* in germline  
28 using RNAi and gene editing. Although individual embryonic RNAi exhibited no detectable  
29 phenotypic alterations, simultaneous RNAi of *nosO/ nosP* markedly reduced oocyte number and  
30 male fecundity. Additionally, *nosP* KO almost completely sterilized both sexes. Because *nosP* is  
31 broadly expressed in the posterior of embryos in non-germline specific manner, these results could  
32 reflect an evolutionary step taken by *Bombyx* toward its unique inheritance mechanisms. This study  
33 also suggests that *nos* genes in *Bombyx* do not affect anterior-posterior axis specification. This could  
34 reflect its characteristic embryogenesis.

35

36 **Introduction**

37 During insect embryogenesis, diverse mechanisms using similar sets of genes are employed to  
38 converge on a similar body plan exemplified by the state achieved at the phylotypic stage. How  
39 environment and developmental systems interact to produce such diversity is of interest (Church *et*  
40 *al.*, 2019; Dixon, 1994; Evans, 2014; Whittle and Extavour, 2016, 2017). The lepidopteran insect, *B.*  
41 *mori* is an interesting organism to study because it is phylogenetically close to *Drosophila*. Yet, the  
42 early embryonic processes are quite distinct among insects (Nakao, 2021).

43 In the past decades, efforts have been made to describe such diversity in molecular terms across  
44 insect orders, notably in segmentation and germ cell specification mechanisms (Davis and Patel,  
45 2002; Extavour and Akam, 2003; Peel *et al.*, 2005; Lynch, 2014; Quan and Lynch, 2016).

46 *Drosophila* germ cell specification and PGC formation mechanisms are the best examples, where the  
47 localized maternal cytoplasmic determinant called pole plasm at the posterior egg pole dictates PGC  
48 cell fate to the cells that sequester the determinant during cellularization. This is an example of  
49 inheritance mechanisms of PGC formation, which is widely distributed in the animal kingdom,  
50 including vertebrates. The inherited cytoplasm is generally known as germplasm (Eddy, 1976).  
51 Zygotic induction is another PGC formation mechanism well-known in studies in mice, but is also  
52 known in insects. Zygotic induction is considered an evolutionary ancient mechanism from which  
53 inheritance mechanisms are derived. The distinction is classically well-known, and relatively  
54 recently, the molecular underpinnings have begun to be uncovered (also see below). *vasa* (*vas*) and  
55 *nanos* (*nos*) are classic examples of germ cell marker genes, the products of which are often  
56 associated with the germplasm (Extavour and Akam, 2003; Quan and Lynch, 2016). *nos*, which  
57 encodes a zinc finger translational repressor protein, is found to be essential for the  
58 formation/maintenance of germ cells. In PGCs, it suppresses somatic developmental programs, thus  
59 preserving the undifferentiated state required for germ cell function (Kobayashi *et al.*, 1996; De  
60 Keuckelaere *et al.*, 2018).

61 In insect, *nos* involvement in embryo segmentation is also well-known, and this function may be  
62 evolutionarily conserved (Lall *et al.*, 2003). In *Drosophila*, segmentation occurs nearly  
63 simultaneously through a series of hierarchical genetic cascades that begins with molecular cues  
64 emanating from the anterior and posterior poles of egg cytoplasm after fertilization leading to the  
65 establishment of the positional information along the anterior–posterior axis. *nos* contributes to this  
66 positional information establishment process by suppressing initially uniformly distributed  
67 *hunchback* (*hb*) mRNA from translation posteriorly: *nos* mRNA, slightly enriched in the pole plasm,  
68 is translated exclusively at the posterior pole region, and the translated product (NOS protein)  
69 diffuses anteriorly, thereby creating an anterior-to-posterior *hb* gradient in the posterior part of the  
70 egg. These *Drosophila* embryogenesis mechanisms are now classic textbook examples in  
71 embryology, but they represent a highly derived state, presumably reflecting the requirement for

72 rapid development. In most insects, including the flour beetle *Tribolium castaneum* and the cricket  
73 *Gryllus bimaculatus*, by contrast, segments are generated sequentially in an anterior-to-posterior  
74 order (for review, see Peel *et al.*, 2005; Clark *et al.*, 2019) with mechanical similarity to those in  
75 vertebrate somitogenesis. In *Tribolium*, the involvement of *nos* in segmentation is also reported (also  
76 see below) (Schmitt-Engel *et al.*, 2012; Rudolf *et al.*, 2020). Thus, *hb/nos* interaction may be an  
77 evolutionarily conserved function in insects. Posterior to anterior graded distribution of *nos* mRNA  
78 is observed in other insects, including hemimetaborans, which possess ancient conserved traits  
79 among insects (Lall *et al.*, 2003; Dearden, 2006), where this expression of *nos* may function in both  
80 axial patterning and PGC formation through its function to maintain naïve cell state.

81 The silkworm *Bombyx mori* is a lepidopteran insect, evolutionarily close to diptera, which *Drosophila*  
82 belongs to. However, it is quite distinct in terms of segmentation and PGC formation from  
83 *Drosophila* and features unobserved in other insects, suggesting a unique evolutionary process  
84 (Nakao, 2021). One of such features is the molecular prepattern established during oogenesis, which  
85 is required for such embryogenesis processes as segmentation and dorso-ventral pattern formation:  
86 the germ anlage is distinguished by the existence of maternally localized structure or molecules  
87 (Kobayashi and Miya, 1987; Nakao, 1999, 2008); within the germ anlage, mRNAs of anterior and  
88 posterior organizing genes, *orthodenticle (otd)* and *caudal (cad)*, are localized anteriorly and  
89 posteriorly, respectively (Nakao, 2012). An inference from such features is that, although it has a  
90 large germ anlage, characteristics attributed to long germ insects, including *Drosophila*, the  
91 segmentation does not rely on molecular diffusion in such a way as in the case in *Drosophila*, and  
92 segmentation proceeds essentially in a cellular environment, not in the syncytium as observed in  
93 short germ insects. Indeed, it shares characteristics with both long and short germ insects. Within the  
94 large germ anlage, individual segmental anlage can be fate mapped before blastoderm formation and  
95 without segment addition zone (growth zone)(Myohara, 1994), reminiscent of the case in long germ  
96 insects. However, the segmentation proceeds sequentially in AP order as in short germ insects  
97 (Nakao, 2010). *Krüppel (Kr)* RNAi perturbation study also indicates a feature shared with both long  
98 and short germ insects: the RNAi embryos not only exhibit segmental deletion corresponding to *Kr*  
99 gap domain, as in the case of long germ insects but also truncation of the following segments, as in  
100 short germ insects (Nakao, 2012). A clear departure from such categorization is also indicated by the  
101 results obtained from *hb* RNAi study in *Bombyx*. Unlike other insects studied so far, *Bombyx hb*  
102 RNAi does not result in segmental deletion (Liu and Kaufman, 2004; Mito *et al.*, 2005; He *et al.*,  
103 2006; Marques-Souza *et al.*, 2008). Instead, it leads to supernumerary segment formation (Nakao,  
104 2016), although this phenotype might be masked in the RNAi study of short germ insects by the  
105 truncation of posterior segments. Remarkable features in *Bombyx* are also observed in PGC  
106 formation. Although unlike *Drosophila*, it does not possess structurally recognizable germplasm  
107 within newly deposited eggs, *Bombyx* PGCs are detected morphologically and molecularly soon

108 after blastoderm formation, at relatively an early stage as compared to insects that take the inductive  
109 mode of PGC formation, where PGCs first appear and are morphologically recognized within the  
110 mesoderm of abdominal segments (Miya, 1958; Nakao, 1999; Nakao *et al.*, 2006). However, a study  
111 of the expression of four *nos* genes (*nosM*, N, O, and P) in *Bombyx* revealed that maternal mRNA for  
112 *nosO* appears to be localized within the mesoderm anlage of freshly laid eggs in a pattern that  
113 largely corresponds to the site where future PGCs appear (Nakao *et al.*, 2008) in the posterior ventral  
114 part of the germ anlage ; if it truly represents germplasm, it is a unique germplasm localization  
115 pattern, indicating a novel inheritance mechanism thus far not seen outside lepidopterans. *nosO*  
116 genome editing was then conducted to examine the loss of function phenotype (Nakao and Takasu,  
117 2019). Contrary to the expectations, *nosO* null strains preserved fertility, albeit reduced as oogenesis  
118 was severely compromised. Elimination of *nosO* maternal mRNA did not detectably affect fertility,  
119 although it appeared to have some responsibilities with the early expression of *BmVLG* (*Bombyx*  
120 *vas*), which marks the earliest stage *Bombyx* PGCs. These results suggested that other *nos* genes act  
121 redundantly to specify PGCs in *Bombyx*. Here to pursue this possibility, we examined the roles of  
122 other *nos* genes in the PGC formation process.

123

## 124 **Results**

125 *nosO* and *nosP* double RNAi results in abnormalities in both male and female germ line.

126 Of the four *nos* genes, besides *nosO*, mRNAs for *nosM* and N are also maternally provided as  
127 described above. While *nosM* mRNA does not show any localization and appears uniformly present  
128 within the eggs, *nosN* mRNA exhibits restriction to germ anlage, within which it exists uniformly  
129 (Nakao *et al.*, 2008). Delving more into the possibility of maternal PGC specification mechanisms,  
130 we examined what could result in germ cell formation when the activities of these genes, together  
131 with *nosO*, are perturbed during embryogenesis. For this purpose, embryonic RNAi was done, and  
132 the effect was examined by mature oocyte number and morphology of newly emerged insects as  
133 described previously. The effectiveness of RNAi is shown by the reduction in the specific *in situ*  
134 hybridization signal for each gene (Fig.1).

135 When either *nosM* or *nosN* activities are reduced or reduced in combination with *nosO* reduction  
136 (*nosM/O*, *nosN/O*), no effects are observed (data not shown; Fig.2C, D). Moreover, triple reduction  
137 of *nosM*, N, and O did not detectably affect germ cell formation (data not shown). If *nos* genes are  
138 essential in PGC formation as demonstrated in other systems, these results suggest that although we  
139 could not rule out the possibility that maternally provided proteins, if in existence, might affect this  
140 process, at least *de novo nos* activities from maternal transcript from these genes are not essential in  
141 PGC formation in *Bombyx*.

142 In contrast to these *nos* genes, *nosP* appears to be expressed exclusively zygotically: its expression  
143 begins after germ band formation in its posterior part; as the segmentation proceeds, the expression

144 domain retracts posteriorly following the posterior retraction of PGCs. Indeed, during this retraction  
145 process, the *nosP* expression domain appears to continuously cover the region where PGCs exist  
146 (Nakao et al., 2008), suggesting that *nosP* may have a role in PGC formation/maintenance. To  
147 investigate this possibility, we next examined the phenotype of *nosP* RNAi embryos. The individuals  
148 treated for *nosP* RNAi alone exhibited no obvious difference from the untreated ones (Fig. 2E,  
149 compare with Fig. 2A). However, when combined with *nosO* RNAi (*nosO/P*), the resulting moths  
150 exhibited marked reduction in the oocyte number (Fig. 2F; Fig.3B, compare with Fig.3A), together  
151 with aberrant morphology in some remaining oocytes. In most severe cases, the treated female  
152 moths had only a few oocytes (Fig. 3B). Also, the testis of *nosO/P* treated moths often showed partly  
153 transparent appearance (Fig.3D, compared with Fig.3C). To examine the fertility of these male  
154 moths, they were crossed with wild-type females. The resulting female moths laid several-fold  
155 reduced number of eggs as compared to control (wild vs. wild) crosses, and none of these eggs  
156 showed signs of development, while the control eggs were normally developed (Fig. 4). These  
157 results indicate that the treated males are sterile. The specificity of this RNAi to both *nosO* and *nosP*  
158 genes was confirmed by examining the effect of independently prepared dsRNAs targeting the  
159 non-overlapping sequence of each gene. As described above, combinatorial RNAi of *nosO* with  
160 either *nosM*, *nosN*, or *nosM* and *N* did not show any detectable anomalies. The same was true for  
161 *nosO* RNAi of double strength (*nosO* (2x)) (Fig. 2G). The insects with a combined reduction of  
162 *nosP* with either *nosM* (*nosM/P*), *nosN* (*nosN/P*), or *nosM* and *N* also had no detectable  
163 developmental defects (Fig. 2H, I; data not shown).

#### 164 165 *nosP* genome editing produced sterile moths

166 To confirm and extend the RNAi study in the previous section, transcription-activator-like effector  
167 nuclease (TALEN)-mediated *nosP* genome editing was conducted to make knock-out (KO) alleles.  
168 Two strategies were employed for their production: introduction of point mutation in the 5'-region of  
169 the amino acid coding sequence (CDS) and the removal of a large part of CDS by cutting at two  
170 target sites (Fig. 5A). The resulting frameshift mutation in the former strategy was expected to  
171 induce nonsense-mediated mRNA decay and produce null mutants.

172 The editing procedure was described previously, and two lines harboring *nosP*-edited allele  
173 corresponding to different procedures described above were established. Using these lines,  
174 phenotype analyses were conducted. Essentially, the same results were obtained for the resulting  
175 edited individuals irrespective of these two strategies.

176 Unexpectedly, *nosP*(-/-)homozygotic moths were sterile. While testis was not found in males (Fig.  
177 6B, compare with Fig. 6A), female moths were almost devoid of oocytes, i.e., almost all the  
178 ovarioles were empty (Fig. 6D, compare with Fig. 6C). However, curiously, a few developed oocytes  
179 were almost always observed in the resulting females. To examine the fertility of the edited males,

180 homozygous *nosP*-KO-males were mated with wild-type females, and the resultant eggs were  
181 allowed to develop (see **Materials and Methods**). Similar to the case observed in the RNAi  
182 experiment, fewer eggs were laid, and they did not hatch, while the control crosses produced a  
183 normal number of viable eggs (data not shown). In another experiment, wild-type female moths  
184 already subjected to mating with *nosP*-edited males and subsequent egg deposition were thereafter  
185 crossed with wild-type male moths and eggs were laid. While a large number of viable eggs were  
186 laid after subsequent crossing with wild-type males, very reduced number eggs, all of which were  
187 sterile, were laid after prior crossings with *nosP*-edited males (Fig. 7). This not only confirmed the  
188 ability of these females to produce viable eggs but also indicated that the functional sperm  
189 production ability of males somehow leads to the stimulation of egg laying. The cause of this  
190 phenomenon is unknown, but it could be due to a direct effect of the existence of (functional) sperm  
191 or some indirect effect of the presence of some stimulating substance(s) or function, production, or  
192 function of which is affected by the process of normal sperm generation.

193

194 *Does Bombyx not require nos gene activities in AP patterning?*

195 The study described above indicated that *nosP* gene does not appear to have AP patterning function  
196 because the external morphology of *nosP*-KO insects appeared normal (data not shown). This was  
197 unexpected since AP patterning functions are considered conserved in insects (see **Introduction**)  
198 and *Bombyx nosP* is the only gene expected to be expressed in the posterior restricted manner among  
199 the four *Bombyx nos* (see **Discussion**). This raised the possibility that *nos* gene activities are not  
200 essential in *Bombyx* embryonic AP patterning. Indeed, no marked difference in embryogenesis was  
201 discerned in the moths that have subjected to RNAi procedure for all four *nos* genes as compared to  
202 the cases in other RNAi experiments described above: the ratio of eggs that resulted in successful  
203 embryogenesis after dsRNA injection did not appear to show marked difference. This is consistent  
204 with the fact that healthy female moths were obtained after RNAi against four *nos* genes except for  
205 showing a severe reduction in mature oocyte number, which testified that the RNAi procedure is  
206 functional despite their high dsRNA load. However, these moths could have somehow alleviated the  
207 morphological effect of the other *nos* genes, if any, that resulted in the completion of embryogenesis,  
208 leading to the successful hatching and the growth to adulthood, whereas other affected embryos  
209 might have died with such an effect unrecognized. To obtain more unbiased result, embryogenesis  
210 was examined for eggs with features of successful dsRNA injection (see **Materials and Methods**)  
211 after dsRNA injection more directly by dissection 5 days after egg laying, when the basic larval  
212 features became apparent. About one-third of both control (enhanced green fluorescent protein  
213 dsRNA [12 µg/µl] injected-) and *nos* dsRNA (3 µg/µl for each: total of 12 µg/µl) injected embryos  
214 showed normal appearance (n=6/15 for control and n=5/16 for *nos* injected). The other embryos  
215 from the control showed deficiencies in the anterior (head) part of the embryos. The cause of this



216 phenotype is unclear, but it might be due to some mechanical stress caused by the deformation of the  
217 eggshell as an effect of injection or might be caused by the injection of large amount of dsRNA, or  
218 some other reasons. From the *nos* RNAi-treated embryos, embryos showing some anomalies in the  
219 posterior regions of the embryos were also observed (n=6/15). The significance of this finding is  
220 unclear. For these embryos, some perturbation in the morphogenetic process appears to have  
221 occurred after normal patterning, whether this is a *nos* RNAi specific effect also remains to be  
222 clarified. This high rate occurrence of normal embryos appears to be significant considering that, in  
223 our hands, usually, a specific phenotype had occurred at very high penetrance ( $\geq 90\%$ ) after RNAi of  
224 developmentally essential genes (*otd*, *cad*, *Kr*; pair-rule genes; Nakao, 2010, 2012). These results  
225 suggest that the function of *nos* genes in *Bombyx*, if any, does not consist of the main part of the  
226 embryonic patterning, but is conditionally evoked for its robustness.

227

## 228 **Discussion**

### 229 *Bombyx nos* function in germ cell formation/maintenance

230 In the previous study, the functional analysis of *nosO* by embryonic RNAi and gene editing was  
231 performed since its expression pattern suggests its critical roles in PGC specification/maintenance.  
232 We found severe abnormalities during oogenesis, and some hint at its involvement in PGC  
233 specification/maintenance in *nosO* KO's. However, albeit severely reduced, the fecundity was not  
234 completely eliminated, which made it possible to establish *nosO* KO lines. Indeed, the plausible  
235 effect on PGC specification/maintenance, i.e., generating female insects with a severely reduced  
236 number of oocytes, was only rarely observed in *nosO*-KO insects. Considering the *nos* gene plays  
237 essential roles in the maintenance of PGCs in *Drosophila* or in mice, these observations suggested  
238 the possibility that the other *nos* genes complement the function of *nosO*. This study addressed this  
239 possibility and identified such a function in *nosP* during embryogenesis, the functional redundancy  
240 between *nosO* and *nosP*: while individual RNAi study against these genes did not lead to the  
241 reduction in the oocyte cell number, the simultaneous RNAi did. In the most severe cases, the female  
242 moths were almost devoid of oocyte, and similarly treated male moths lost fecundity. This RNAi,  
243 together with *nosP* KO results suggest that the RNAi exerts its effect on the embryonic expression of  
244 *nosO* and *nosP*, and that these genes are involved in PGC formation/maintenance. Although the  
245 previous study has seen considerable cases of oocyte number reduction in the *nosO* RNAi  
246 experiment, such an effect was not observed in this study. The reason for this discrepancy is unclear.  
247 Possible explanations for this could be either that the characteristics of silkmoth strain might have  
248 changed during successive rearing or that experimental conditions might not have been identical. For  
249 the latter, the embryonic RNAi experiments as conducted in this study have at present some  
250 uncontrollable elements in our hands, and the hatching rate after injection differs greatly between  
251 experiments. Indeed, this series of RNAi experiments was generally conducted under higher



252 hatching rate after injection as compared to the previous study.

253 As described in the **Introduction**, metazoan PGCs are known to be specified by zygotic induction or  
254 inheritance, which is derived from zygotic induction. Because PGC specification and embryonic  
255 axial patterning mechanisms appear intimately linked, it is highly likely that the inheritance  
256 mechanism co-evolved with the evolution of the axial patterning mechanisms. Presently, the  
257 molecular definition of PGCs is ambiguous, but the main functions are considered to be the  
258 preservation of the genome integrity and totipotency. For this purpose, mechanisms appear to have  
259 been evolved during PGC specification process to counteract the insults inflicted on PGC precursors  
260 accompanied by the progression of axial patterning. These mechanisms may differ depending on the  
261 axial patterning mechanisms, which vary greatly between insects, i.e., there may be various  
262 molecular paths toward PGC specification. This can be seen in the requirement of *nos* gene function  
263 in PGC specification/maintenance. In *Drosophila*, slightly posterior-pole enriched maternal *nos*  
264 mRNA is exclusively translated at the posterior pole, and translated protein either diffuses within the  
265 syncytium anteriorly to repress *hb* mRNA or are sequestered directly within pole cells at its  
266 formation; in the pole cells (PGCs) thereafter, NOS protein represses somatic gene expression to  
267 maintain an undifferentiated state (Kobayashi *et al.*, 1996). In the honeybee *Apis mellifera*, however,  
268 *nos* gene function may not be required in the early embryonic PGC specification/maintenance  
269 processes (Dearden, 2006). In *Bombyx*, this RNAi study indicated the absolute requirement of *nos*  
270 function in PGC specification/maintenance and clarified the redundancy of *nosO* and *nosP* for this  
271 function. Despite such a redundancy, their spatial expression patterns differ; while *nosO* mRNA  
272 enriches in PGCs, *nosP* appears to be expressed uniformly in the posterior part of the embryos  
273 irrespective of cell type. The previous study could not clarify the function of maternal *nosO*, which  
274 is likely mediated through the localized mRNA that regulates the expression *BmVLG* along with its  
275 zygotic activities (Nakao and Takasu, 2019). The functional redundancy described above suggests  
276 that the maternal *nosO* mRNA contributes to robust PGC formation and is indeed involved in the  
277 inheritance mechanisms: without *nosO*, the PGC formation would be vulnerable to perturbations.  
278 This feature of *nosO* suggests a situation similar to *Drosophila*, although functional requirement  
279 during early embryonic stages appears limited, as suggested from the previous study (Nakao and  
280 Takasu, 2019). However, *nosP* influence on PGC formation is reminiscent of zygotic induction in  
281 that it is expressed broadly in the posterior of the embryos in a non-PGC specific manner and the  
282 mRNA expression pattern does not suggest that the gene activity provides a cue for the cells to  
283 become PGCs. Recent studies in *Gryllus* clarified some features of zygotic induction mechanisms in  
284 insects, in which similarities to vertebrate PGC specification mechanisms have been uncovered, such  
285 as the involvement of *Blimp1* and TGF- $\beta$  (BMP) signaling (Donoughe, *et al.*, 2014; Nakamura and  
286 Extavour, 2016). These and other studies indicate that PGC specification occurs progressively  
287 (Ewen-Campen *et al.*, 2013; Barnett *et al.*, 2019): in *Gryllus*, *HOX* genes are revealed to limit PGCs

288 to specific abdominal segments. Likewise, the *nosP* may function in limiting PGCs to its expressed  
289 zone. These suggest such *nosP* function, which acts either cell-autonomously or  
290 cell-non-autonomously, or both, might be a remnant of the ancestral zygotic mechanisms, where *nos*  
291 function might be required for the specification of PGCs. This idea is consistent with both the  
292 evidence that *nosP* preserved ancestral characteristics among the four *nos* genes and  
293 phylogenetically close to mammalian *nos* genes (De Keuckelaere *et al.*, 2018), and with the result in  
294 this study that *nosP* KO leads to virtually complete sterility, which suggests that *nosP* plays central  
295 roles in germ cell functioning. *nosO*, however, may have later evolved to gain specialized function in  
296 PGC specification/maintenance with the evolution of axial patterning mechanisms by acting as a  
297 player in the inheritance mechanisms and contributed to the early PGC specification seen in *Bombyx*.  
298 The previous study suggests the existence of maternal cue colocalized with *nosO* mRNA: even when  
299 maternally localized *nosO* mRNA is eliminated, PGCs as examined by *BmVLG* (*Bombyx vas*  
300 homolog) still appear in the similar location and at a similar time as in the wild-type (Nakao and  
301 Takasu, 2018) without detectable localized zygotic *nosO* mRNA, suggesting that this feature  
302 represents an evolutionary path toward its unique PGC specification mechanisms.

303 In *Gryllus*, the mesodermal origin of PGCs is also suggested; RNAi knockdown of *twist*, a gene  
304 essential for mesoderm formation, led to the elimination of PGCs. Whereas in *Bombyx* eggs,  
305 maternal *nosO* mRNA appears to be localized in the mesodermal anlage (Nakao *et al.*, 2008; Nakao,  
306 2010), which suggests that *Bombyx* PGCs arise from cell population destined to be part of mesoderm  
307 in the absence of such a maternal cue. From this, we can speculate that these two species have in  
308 common some mechanisms in PGC formation, which may indicate an evolutionary relationship or  
309 deep homology. This apparently shared feature may be related to the fact that the germ anlage of  
310 these insects occur as a ventral anlage without covering the posterior pole (Pechmann *et al.*, 2021;  
311 Nakao, 2021). However, presently, the detailed ontogeny of *Gryllus* PGCs is unclear and there  
312 remains the possibility that the RNAi result described in the *Gryllus* study implies the necessity of  
313 mesoderm for the maintenance of PGCs, and not PGCs mesodermal origin. In contrast to the case in  
314 *Bombyx*, however, available information does not indicate the provision of a maternal cue in *Gryllus*:  
315 *vas* and *piwi* parental and embryonic RNAi do not affect PGC formation, consistent with the view  
316 that zygotic induction mechanisms operate in this species. These suggest that the ancient  
317 mechanisms of PGC formation as seen in *Gryllus* are modulated by the existence of a  
318 maternal/preexistent zygotic cue in *Bombyx*; such a cue (or bias) to be PGCs might have substituted  
319 for the stochastic process possibly occurring in ancestral zygotic induction to, for instance, make  
320 *Bombyx* PGC formation robust and this function of maternal cue could be responsible for the earlier  
321 appearance of PGCs in *Bombyx* compared to such insects as *Gryllus* that takes induction mode of  
322 PGC formation. However, because how PGCs are formed in *nosO* KO's is still unknown, such as  
323 their ontogeny, for instance, the possibility that in *Bombyx*, both ancient (zygotic induction) and

324 derived (inheritance) mode of PGC formation operate in parallel, i.e., the dual ontogeny, cannot be  
325 ruled out. Considering the importance of *nos* gene in this context, it is also important to know the  
326 role of *nos* gene in *Gryllus* PGC formation, which is currently unavailable. From this perspective, it  
327 is interesting to know whether *nosO* and *nosP* have different targets and, if this is the case, their  
328 identity. Such information could provide an example of molecular mechanisms toward inheritance.  
329 In *Drosophila*, a classic example of harboring inheritance mechanisms in PGC specification, TGF  
330 signaling after fertilization was recently shown to be involved in the pole cell formation process by  
331 modulating the action of pole plasm, indicating the involvement of zygotic mechanisms in PGC  
332 specification. Thus, the cases of involvement of both mechanisms of PGC formation in one organism  
333 may be widespread as seen in an example in this study, and such mechanisms may be important for  
334 the integrity of organismal development. A recent review on insect PGC formation mechanisms  
335 suggests the liability of PGC specification mechanisms. Based on the lack of *oskar* gene in *Bombyx*,  
336 its PGC formation mechanisms have been suggested as an example of returning to ancestral zygotic  
337 mechanisms (Lynch *et al.*, 2011). The results obtained in this study do not clarify whether this is  
338 indeed the case. However, it might be possible that the simultaneous existence of both mechanisms  
339 contributes to such liabilities.

340

#### 341 *nos* function in early *Bombyx* embryogenesis

342 As described above, inheritance mechanisms appear to have evolved to counteract the effect of the  
343 somatic developmental program accompanied by the evolutionary change in axial patterning  
344 mechanism. For example, *Drosophila* and *Nasonia* developed mechanisms of segregating PGCs as  
345 pole cells located at the posterior pole before the beginning of the somatic program. This strategy is  
346 effective because, in these insects, axial patterning occurs in an environment where molecular  
347 diffusion is allowed at the syncytium blastoderm stage after pole cell segregation. By contrast,  
348 *Bombyx* PGCs appear relatively late after blastoderm formation among cells undergoing somatic  
349 development. *Bombyx* strategy for early development is unique in that the periplasm of newly  
350 deposited eggs has maternally established localized distribution of mRNA for organizing molecules  
351 specifying early embryonic development, a condition in *Drosophila* that appears to be largely  
352 corresponds to that attained after diffusion of these molecules in the syncytium. This suggests the  
353 possibility that cells that eventually become PGCs receive positional information similarly dictating  
354 early embryonic development to cells destined to soma. Maternally localized *nosO* mRNA could  
355 contribute to counteracting this effect toward somatic development, although this function could not  
356 be experimentally detected in the previous studies.

357 With their early embryonic expression patterns, *nosM* and *nosN* functions may also reflect the  
358 unique early embryogenesis feature of *Bombyx*. As a translational regulator, *nosM*, which appears to  
359 be distributed within the eggs uniformly, might be involved in the initiation of embryonic

360 development or an event as zygotic gene activation, or *nosN*, which is expressed uniformly within  
361 the germ anlage, might have a function in fine tuning the timing of translation of localized transcript  
362 within the germ anlage, which might ensure the function of the pre-established boundary between  
363 embryonic vs. extraembryonic region.

364

365 *Is nos involved in embryonic AP pattern formation in Bombyx?*

366 Although validated cases are scarce, another possibly conserved function of *nos* other than those in  
367 germ cells in insects is their involvement in embryonic AP patterning through repression of *hb*  
368 translation. The function for abdomen development in *Drosophila* is well-known, as described in the  
369 **Introduction**. In *Tribolium*, RNAi perturbation of *nos* function is reported to result in developmental  
370 arrest by affecting the process of posterior segmentation and in another study, in the acceleration of  
371 blastodermal AP patterning process (Schmitt-Engel *et al.*, 2012; Rudolf *et al.*, 2020). Such functions  
372 of *nos* may reflect the posterior expression of *nos* genes observed in some insects (Lall *et al.*, 2003).  
373 Of the four *nos* genes identified in *Bombyx*, only *nosP* mRNA exhibited a posterior expression  
374 pattern. Therefore, it was rather surprising that *nosP* KOs develop normally because it was expected  
375 that *nosP* function perturbation leads to AP patterning defects. Additionally, the fact that embryonic  
376 RNAi targeted at all four *nos* genes simultaneously did not result in marked difference in  
377 embryogenesis from wild-type might indicate that *nos* gene functions are dispensable for AP  
378 patterning in laboratory environment. These are, however, reasonable if the prime target of *nos* in AP  
379 patterning is *hb* and considering the peculiarity of *Bombyx* AP patterning mechanisms. Of the  
380 examined insects for *hb* function by RNAi studies, *Bombyx* is exceptional in that it did not lead to  
381 posterior truncation phenotype; instead, it leads to supernumerary segment formation as described in  
382 **Introduction**, suggesting that, in *Bombyx*, *hb/nos* system for insect AP patterning may not operate:  
383 *Bombyx* would have developed a means to restrict *hb* expression that does not rely on *nos* functions.  
384 Since *hb* intersect with both AP patterning and PGC formation, changes observed in *hb*  
385 expression/function could have significant implications in considering the evolution of unique  
386 features of *Bombyx* embryogenesis.

387

## 388 **Materials and Methods**

389 *Silkworm strains, rearing, and development*

390 *Bombyx mori* strain pnd-2 used in this study were reared on an artificial diet (Nippon Nosanko) at  
391 28°C. For a general description of early *Bombyx* development, refer to Nagy *et al.*, (1994) and  
392 Nakao (2021).

393

394 *Embryo fixation, in situ hybridization, and RNAi*

395 Embryo fixation, *in situ* hybridization, and RNAi were performed essentially as previously described

396 (Nakao, 1999, 2012; Nakao *et al.*, 2006). In simultaneous RNAi against multiple targets, dsRNA  
397 concentration for each target in injection solutions was 3 µg/µl. dsRNAs were prepared using  
398 MEGAscripts RNAi Kit (Ambion) exactly as described in the manual. The templates used for *in*  
399 *vitro* transcription were PCR fragments of the corresponding genes, flanked by T7 promoter  
400 sequences. The primers used for amplification of those were as follows; *nosM*:  
401 5'-taatacgactcactatagggagagtacgtttcgtttgtcatca-3', 5'-taatacgactcactatagggagaacactgactccccattttc-3';  
402 *nosN*: 5'-taatacgactcactatagggagaggagagcaagagcaacatcttctgt-3,  
403 5'-taatacgactcactatagggagacgacacgtagttgttagcag-3'; *nosO*:  
404 5'-taatacgact-cactatagggagaagtaactaacgcgcctcga-3',  
405 5'-taatacgactcactatagggagatcagggtctcattgcccaca-3'; *nosP*:  
406 5'-taatacgactcactatagggagacaagcattcgatccatcgtg-3', 5'-taatacgactcactatagggagactgatctgctctctttcgga-3'.  
407 Primers for amplification of second non-overlapping *nosO* and *nosP* target; *nosO* (2):  
408 5'-taatacgactcactatagggagaaagtgcagcccaccgaggag-3',  
409 5'-taatacgactcactatagggagactgtccagggcagcccaaa-3'; *nosP* (2):  
410 5'-taatacgactcactatagggagacttttctatgacatcttcggacttg-3',  
411 5'-taatacgactcactatagggagattcgttggttcttttggcg-3'.

412 After injection, irrespective of the injected materials (dsRNA or DNA construct etc.), the eggs with  
413 an air bubble or severely recessed by desiccation appear at various (often high) frequencies, and they  
414 do not complete embryogenesis. These eggs are not considered as "successful injection" and are  
415 omitted from morphological analyses.

416

#### 417 *Generation of nosP knockouts*

418 *nosP* KO's were generated by employing TALEN-mediated genome editing with one or two target  
419 sites (Takasu *et al.*, 2013). For the former procedure, we set a target site within the second coding  
420 exon and expected a pair of TALENs to introduce a frameshift within the coding sequence, resulting  
421 in the generation of premature termination codon and degradation of mRNA by nonsense-mediated  
422 decay pathway. For the latter, target sites were selected such that a large portion of CDS is removed  
423 to eliminate the gene function. Procedures for KO silkworm generation were described previously.  
424 In brief, TALEN vectors were constructed by Golden gate assembly (Cermak *et al.*, 2011), *in vitro*  
425 transcribed using HiScribe T7 ARCA mRNA synthesis kit (New England Biolab) and microinjected  
426 into silkworm embryos within X hours after oviposition. The resultant moths (G0) were crossed to  
427 the wild-type moths to obtain G1 offspring, from which genomic DNA was extracted in adulthood.  
428 Screening for successfully edited silkmoths was conducted by PCR using a pair of primers outside  
429 the target site(s) and for the former procedure, and additionally by subsequent sequence analysis.  
430 The TALEN target sequences and genomic organization of *nosP* are shown in Fig. 6A. The genome  
431 sequence of the edited allele, designated as 20–6, obtained by the former procedure, which was used

432 for subsequent phenotypic analyses, is shown in Fig. 6B compared with wild-type sequence. In this  
433 allele, the 4 bp at the center of the TALEN target is substituted by 20 bp insertion sequence.

434

#### 435 *Examination of male fertilization ability*

436 Male fertilization ability was measured by examining the phenotype of eggs deposited by females  
437 after copulation with RNAi-treated or -edited males and comparing them with control mates using  
438 wild-type males. Newly emerged females were used for this study. After a few hours of mating, the  
439 male and female moths were separated, and the females were left to lay eggs overnight. Successfully  
440 fertilized eggs were either known by the coloration of serosa, which is observable after a few days of  
441 egg deposition, or a sign of cuticle development, which is visible through the chorion at later stages.

442

#### 443 Acknowledgements

444 Competing interests: The authors declare no competing interests

445 Funding: Not applicable

446 Data availability: Not Applicable

447



448 **References**

- 449 Barnett, A.A., Nakamura, T., Extavour, C.G., 2019. HOX genes limit germ cell formation in the  
450 short germ insect *Gryllus bimaculatus*. *Proc. Natl. Acad. Sci. USA* 115, 16430-16435.  
451 <https://doi.org/10.1073/pnas.1816024116>
- 452 Bucher, G., Klingler, M., 2004. Divergent segmentation mechanism in the short germ insect  
453 *Tribolium* revealed by giant expression and function. *Development* 131, 1729–1740.  
454 <https://doi.org/10.1242/dev.01073>
- 455 Carter, J.-M., Gibbs, M., Breuker, C.J., 2015. Divergent RNA localisation patterns of maternal genes  
456 regulating embryonic patterning in the butterfly *Pararge aegeria*. *PLoS One* 10 (12), e0144471.  
457 <http://dx.doi.org/10.1371/journal.pone.0144471>
- 458 Cermak, T., Doyle, E.L., Christian, M., Wang, L., Zhang, Y., et al., 2011. Efficient design and  
459 assembly of custom TALEN and other TAL effector-based constructs for DNA targeting. *Nucleic*  
460 *Acids Research* 39: e82
- 461 Cerny, A., Bucher, G., Schroeder, R., Klingler, M., 2005. Breakdown of abdominal patterning in the  
462 *Tribolium* Krüppel mutant jaws. *Development* 132, 5353-5363. <https://doi.org/10.1242/dev.02154>
- 463 Chang, C-C., Dearden, P., Akam, M., 2002. Germ line development in the grasshopper *Schistocerca*  
464 *gregaria*: *vasa* as a marker. *Dev. Biol.* 252, 100-118. <https://doi.org/10.1006/dbio.2002.0840>
- 465 Church, S.H., Donoughe, S., de Medeiros, B.A.S., Extavour, C.G., 2019. Insect egg size and shape  
466 evolve with ecology but not developmental rate. *Nature* 571, 58-62.  
467 <https://doi.org/10.1038/s41586-019-1302-4>
- 468 Clark, E., Peel, A.D., Akam, M., 2019. Arthropod segmentation. *Development* 146, 170480.  
469 <https://doi.org/10.1242/dev.170480>
- 470 Colonna, M.M., Goyal, Y., Johnson, H.E., Syal, S., Schedl, P., Deshpande, G., 2022. Preformation  
471 and epigenesis converge to specify primordial germ cell fate in the early *Drosophila* embryo. *PLoS*  
472 *Genet.* 18(1), e1010002. <https://doi.org/10.1371/journal.pgen.1010002>
- 473 Daimon, T., Kiuchi, T., Takasu, Y., 2014. Recent progress in genome engineering techniques in the  
474 silkworm, *Bombyx mori*. *Dev. Growth Differ.* 56, 14–25. <https://doi.org/10.1111/dgd.12096>
- 475 Davis, G.K., Patel, N.H., 2002. Short, long, and beyond: molecular and embryological approaches to  
476 insect segmentation. *Annu. Rev. Entomol.* 47, 669-699.  
477 <https://doi.org/10.1146/annurev.ento.47.091201.145251>
- 478 Dearden, P.K., 2006. Germ cell development in the Honeybee (*Apis mellifera*); *vasa* and *nanos*  
479 expression. *BMC Dev. Biol.* 6, 6. <https://doi.org/10.1186/1471-213X-6-6>
- 480 De Keuckelaere, E., Hulpiau, P., Saeys, Y., Berx, G., van Roy, F., 2018. *Nanos* genes and their role in  
481 development and beyond. *Cell. Mol. Life Sci.* 75, 1929–1946.  
482 <https://doi.org/10.1007/s00018-018-2766-3>
- 483 Dixon, K.E., 1994. Evolutionary aspects of primordial germ cell formation. *CIBA Found. Symp.* 182,



484 92–120.

485 Donoughe, S., Nakamura, T., Ewen-Campen, B., Green, D.A., Henderson, L., Extavour, C.G., 2014.

486 BMP signaling is required for the generation of primordial germ cells in an insect. *Proc. Natl. Acad.*

487 *Sci. USA* 111, 4133–4138. <https://doi.org/10.1073/pnas.1400525111>

488 Eddy, M., 1976. Germ plasm and the differentiation of the germ cell line. *Int. Rev. Cytol.* 43,

489 229–280. [https://doi.org/10.1016/S0074-7696\(08\)60070-4](https://doi.org/10.1016/S0074-7696(08)60070-4)

490 El-Sherif, E., Averof, M., Brown, S.J., 2012. A segmentation clock operating in blastoderm and

491 germband stages of *Tribolium* development. *Development* 139, 4341–4346.

492 <https://doi.org/10.1242/dev.085126>

493 Evans, T., Wade, C.M., Chapman, F.A., Johnson, A.D., Loose, M., 2014. Acquisition of germ plasm

494 accelerates vertebrate evolution. *Science* 344 (6180), 200–203.

495 <https://doi.org/10.1126/science.1249325>

496 Ewen-Campen, B., Donoughe, S., Clarke, D.N., Extavour, C.G., 2013. Germ cell specification

497 requires zygotic mechanisms rather than germ plasm in a basally branching insect. *Curr. Biol.* 23,

498 835–842. <https://doi.org/10.1016/j.cub.2013.03.063>

499 Extavour, C.G., Akam, M.E., 2003. Mechanisms of germ cell specification across the metazoans:

500 epigenesis and preformation. *Development* 130, 5869–5884. <https://doi.org/10.1242/dev.00804>

501 Gavis, E.R., Lehmann, R., 1994. Translational regulation of *nanos* by RNA localization. *Nature* 369

502 (6478), 315–318. <https://doi.org/10.1038/369315a0>

503 He, Z.-B., Cao, Y.-Q., Yin, Y.-P., Wang, Z.-K., Chen, B., Peng, G.-X., Xia, Y.-X., 2006. Role of

504 hunchback in segment patterning of *Locusta migratoria manilensis* revealed by parental RNAi. *Dev.*

505 *Growth Differ.* 48, 439–445. <https://doi.org/10.1111/j.1440-169X.2006.00881.x>

506 Kobayashi, S., Yamada, M., Asaoka, M., Kitamura, T., 1996. Essential role of the posterior

507 morphogen *nanos* for germline development in *Drosophila*. *Nature* 380, 708–711.

508 <https://doi.org/10.1038/380708a0>

509 Kobayashi, Y., Miya, K., 1987. Structure of egg cortex relating to presumptive embryonic and

510 extraembryonic regions in silkworm, *Bombyx mori* (Bombycidae: Lepidoptera). In: Ando H,

511 Jura Cz (eds) Recent advances in insect embryology in Japan and Poland. ISEBU, Tsukuba, pp 181–

512 194.

513 Lall, S., Ludwig, M.Z., Patel, N.H., 2003. *Nanos* plays a conserved role in axial patterning outside

514 of the Diptera. *Curr. Biol.* 13 (3), 224–229. [https://doi.org/10.1016/S0960-9822\(03\)00045-9](https://doi.org/10.1016/S0960-9822(03)00045-9)

515 Liu, P.Z., Kaufman, T.C., 2004. hunchback is required for suppression of abdominal identity, and for

516 proper germband growth and segmentation in the intermediate germband insect *Oncopeltus fasciatus*.

517 *Development* 131, 1515–1527. <https://doi.org/10.1242/dev.01046>

518 Lynch, J.A., Ozuak, O., Khila, A., Abouhelf, E., Desplan, C., Roth, S., 2011. The phylogenetic origin

519 of oskar coincided with the origin of maternally provisioned germ plasm and pole cells at the base of

- 520 Holometabola. PLoS Genet. 7, e1002029. <https://doi.org/10.1371/journal.pgen.1002029>
- 521 Lynch, J.A., 2014. Diversity of molecules and mechanisms in establishing insect anterior–posterior  
522 polarity. Curr. Opin. Insect Sci. 1, 39–44. <https://doi.org/10.1016/j.cois.2014.05.003>
- 523 Marques-Souza, H., Aranda, M., Tautz, D., 2008. Delimiting the conserved features of hunchback  
524 function for the trunk organization of insects. Development 135, 881–888.  
525 <https://doi.org/10.1242/dev.018317>
- 526 Mito, T., Okamoto, H., Shinahara, W., Shinmyo, Y., Miyawaki, K., Ohuchi, H., Noji, S., 2006.  
527 Krüppel acts as a gap gene regulating expression of hunchback and even-skipped in the intermediate  
528 germ cricket *Gryllus bimaculatus*. Dev. Biol. 294, 471–481.  
529 <https://doi.org/10.1016/j.ydbio.2005.12.057>
- 530 Mito, T., Sarashina, I., Zhang, H., Iwahashi, A., Okamoto, H., Miyawaki, K., Shinmyo, Y., Ohuchi,  
531 H., Noji, S., 2005. Non-canonical functions of hunchback in segment patterning of the intermediate  
532 germ cricket *Gryllus bimaculatus*. Development 132, 2069–2079. <https://doi.org/10.1242/dev.01784>
- 533 Myohara, M., 1994. Fate mapping of the silkworm, *Bombyx mori*, using localized irradiation of the  
534 egg at fertilization. Development 120: 2869–2877. <https://doi.org/10.1242/dev.120.10.2869>
- 535 Nagy, L., Riddiford, L., Kiguchi, K., 1994. Morphogenesis in the early embryo of the Lepidopteran  
536 *Bombyx mori*. Dev. Biol. 165, 137–151. <https://doi.org/10.1006/dbio.1994.1241>
- 537 Nakamura, T., Extavour, C.G., 2016. The transcriptional repressor Blimp-1 acts downstream of BMP  
538 signaling to generate primordial germ cells in the cricket *Gryllus bimaculatus*. Development 143,  
539 255–263. <https://doi.org/10.1242/dev.127563>
- 540 Nakao, H., 2010. Characterization of *Bombyx* embryo segmentation process: expression profiles of  
541 engrailed, even-skipped, caudal, and *wnt1/wingless* homologues. J. Exp. Zool. B Mol. Dev. Evol.  
542 314B, 224–231. <https://doi.org/10.1002/jez.b.21328>
- 543 Nakao, H., 2012. Anterior and posterior centers jointly regulate *Bombyx* embryo body segmentation.  
544 Dev. Biol. 371, 293–301. <https://doi.org/10.1016/j.ydbio.2012.08.029>
- 545 Nakao, H., 2015. Analyses of interactions among pair-rule genes and the gap gene Krüppel in  
546 *Bombyx* segmentation. Dev Biol 371:293–301. <https://doi.org/10.1016/j.ydbio.2015.06.012>
- 547 Nakao, H., 2016. Hunchback knockdown induces supernumerary segment formation in *Bombyx*.  
548 Dev Biol 413:207–216. <https://doi.org/10.1016/j.ydbio.2016.03.024>
- 549 Nakao, H., 2021. Early embryonic development of *Bombyx mori*. Dev. Genes Evol. 231, 95–107.  
550 <https://doi.org/10.1007/s00427-021-00679-8>
- 551 Nakao, H., Hatakeyama, M., Lee, J.M., Shimoda, M., Kanda, T., 2006. Expression pattern of  
552 *Bombyx* vasa-like (BmVLG) protein and its implications in germ cell development. Dev. Genes  
553 Evol. 216, 94–99. <https://doi.org/10.1007/s00427-005-0033-8>
- 554 Nakao, H., Matsumoto, T., Oba, Y., Niimi, T., Yaginuma, T., 2008. Germ cell specification and early  
555 embryonic patterning in *Bombyx mori* as revealed by *nanos* orthologues. Evol. Dev. 10 (5), 546–554.

- 556 <https://doi.org/10.1111/j.1525-142X.2008.00270.x>
- 557 Nakao, H., Takasu, Y., 2019. Complexities in Bombyx germ cell formation process revealed by  
558 Bm-nosO (a Bombyx homolog of *nanos*) knockout. Dev. Biol. 445, 29-36.  
559 <https://doi.org/10.1016/j.ydbio.2018.10.012>
- 560 Ohinata, Y., Ohta, H., Shigeta, M., Yamanaka, K., Wakayama, T., Saitou, M., 2009. A signaling  
561 principle for the specification of the germ cell lineage in mice. Cell 137, 571-584.  
562 <https://doi.org/10.1016/j.cell.2009.03.014>
- 563 Pechmann, M., Kenny, N.J., Pott, L., Heger, P., Chen, Y-T., Buchta, T., Özüak, O., Lynch, J., Roth,  
564 S., 2021. Striking parallels between dorsoventral patterning in Drosophila and Gryllus reveal a  
565 complex evolutionary history behind a model gene regulatory network. eLife 10:e68287.  
566 <https://doi.org/10.7554/eLife.68287>
- 567 Peel, A.D., Chipman, A.D., Akam, M., 2005 Arthropod segmentation: beyond the Drosophila  
568 paradigm. Nat. Rev. Genet. 6, 905-916. <https://doi.org/10.1038/nrg1724>
- 569 Quan, H., Lynch, J.A., 2016. The evolution of insect germline specification strategies. Curr. Opin.  
570 Insect Sci. 13, 99–105. <https://doi.org/10.1016/j.cois.2016.02.013>
- 571 Rudolf, H., Zellner, C., El-Sherif, E., 2020. Speeding up anterior-posterior patterning of insects by  
572 differential initialization of the gap gene cascade. Dev. Biol. 460, 20-31.  
573 <https://doi.org/10.1016/j.ydbio.2019.04.015>
- 574 Sarrazin, A.F., Peel, A.D., Averof, M.A., 2012. Segmentation clock with two segment periodicity in  
575 insects. Science 336, 338-341. <https://doi.org/10.1126/science.1218256>
- 576 Savard, J., Marques-Souza, H., Aranda, M., Tautz, D., 2006. A Segmentation gene in Tribolium  
577 produces a polycistronic mRNA that codes for multiple conserved peptides. Cell 126, 559–569.  
578 <https://doi.org/10.1016/j.cell.2006.05.053>
- 579 Schmitt-Engel, C., Cerny, A.C., Schoppmeier, M., 2012. A dual role for *nanos* and *pumilio* in  
580 anterior and posterior blastodermal patterning of the short-germ beetle *Tribolium castaneum*. Dev.  
581 Biol. 364, 224-235. <https://doi.org/10.1016/j.ydbio.2012.01.024>
- 582 Takasu, Y., Sajwan, S., Daimon, T., Osanai-Futahashi, M., Uchino, K., Sezutsu, H., Tamura, T.,  
583 Zurovec, M., 2013. Efficient TALEN construction for Bombyx gene targeting. PLoS One 18, e73458.  
584 <https://doi.org/10.1371/journal.pone.0073458>
- 585 Whittle, C.A., Extavour, C.G., 2016. Refuting the hypothesis that the acquisition of germ plasm  
586 accelerates animal evolution. Nat. Commun. 7, 12637. <https://doi.org/10.1038/ncomms12637>
- 587 Whittle, C.A., Extavour, C.G., 2017. Causes and evolutionary consequences of primordial germ-cell  
588 specification mode in metazoans. Proc. Natl. Acad. Sci. USA 114, 5784–5791.  
589 <https://doi.org/10.1073/pnas.1610600114>
- 590 Zhu, X., Rudolf, H., Haeley, L., François, P., Brown, S. J., Klingler, M. and El-Sherif, E. 2017.  
591 Speed regulation of genetic cascades allows for evolvability in the body plan specification of insects.

592 Proc. Natl. Acad. Sci. USA 114, E8646-E8655. <https://doi.org/10.1073/pnas.1702478114>

593

594 **Figure legends**

595

596 Fig. 1 Effectiveness of RNAi targeting *Bombyx nos* genes. RNAi induced degradation of target  
597 mRNAs were examined by *in situ* hybridization.

598 Wild-type expression of *nosM* (A), *nosN* (B), *nosO* (C) and *nosP* (D) at 14 h after egg laying (AEL)  
599 embryos. Expression of respective genes for *nosM* (E), *nosN* (F), *nosO* (G) and *nosP* (H)  
600 RNAi-treated embryos at 14 h AEL. Inside the white dotted lines in (A) and (E) approximate the  
601 position of the germ anlage. In (A), *nosM* expressed region is weak but the demarcation of the  
602 expressed region and unexpressed part that corresponds to the border of germ anlage and  
603 extraembryonic region, is clearly recognizable at the anterior (arrow). For *nosN*, strong expression in  
604 (B) is not observed in (F). For *nosO* and *nosP*, typical expression pattern of respective genes  
605 (indicated by brackets in (C) and (D); see text, Nakao, 2010) is not observed in treated embryos ((G)  
606 and (H), respectively).

607

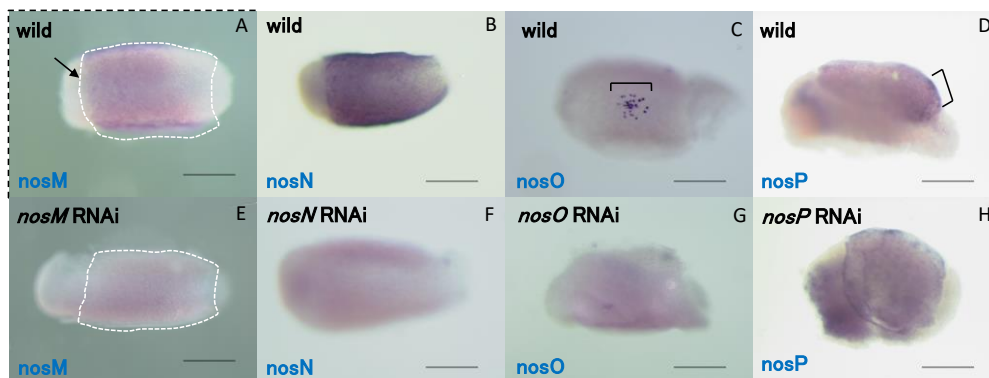

Figure 1

608

609 Fig. 2 RNAi effect on mature oocyte number in treated female moths. The number of mature oocytes  
610 in the control and the RNAi-treated moths were counted, and the number of individuals allocated to  
611 each group was plotted.

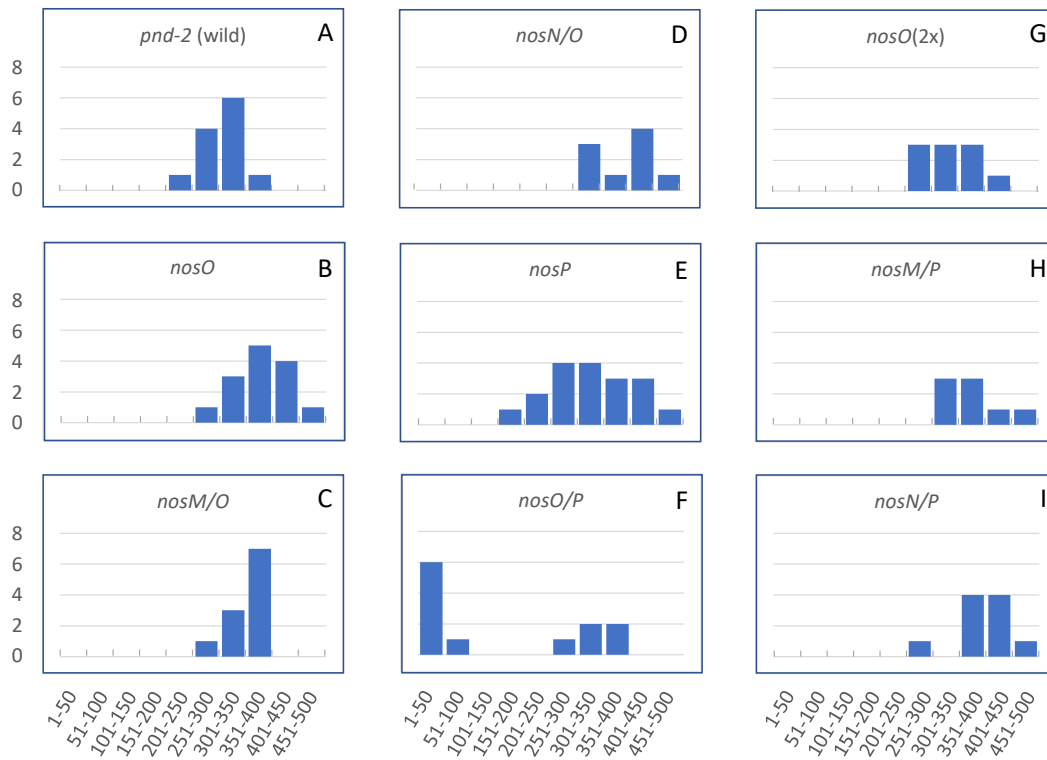

Figure 2

612

613 Fig. 3 *nosO/P* double RNAi effect on gonad formation.

614 (A)(B) Ovaries of wild (A) and RNAi-treated (B) moths. Wild-type ovarioles are full of mature  
615 oocytes, whereas the ovarioles of the RNAi-treated moth are basically empty except for one ovariole  
616 containing a few developed oocytes (arrows). This RNAi-treated sample was an example of the most  
617 severe phenotype.

618 (C)(D) Some examples of testis of wild-type (C) and RNAi-treated (D) moths. In the testis of  
619 RNAi-treated moths, the transparent part is often observed (arrows in (D), (D')): higher magnification  
620 view of dotted square part).

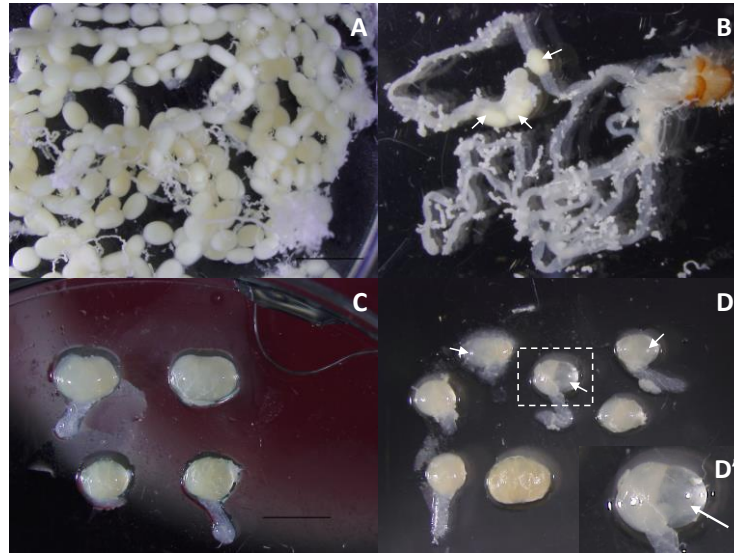

Figure 3

621

622 Fig. 4 Examination of the fertility of *nosO/P* RNAi-treated male moths. Eggs laid by female moths  
623 mated with RNAi-treated male moths (eggs laid by each female moth are circled numbered in A),  
624 and those with wild-type male moths (circled numbered in B) are shown. Each circle in the  
625 photographs indicates eggs deposited by single female moth. Most eggs in B are colored, which  
626 indicates the occurrence of normal development, whereas in A, all the eggs lack coloration,  
627 indicating the absence of egg activation. For details, see text.



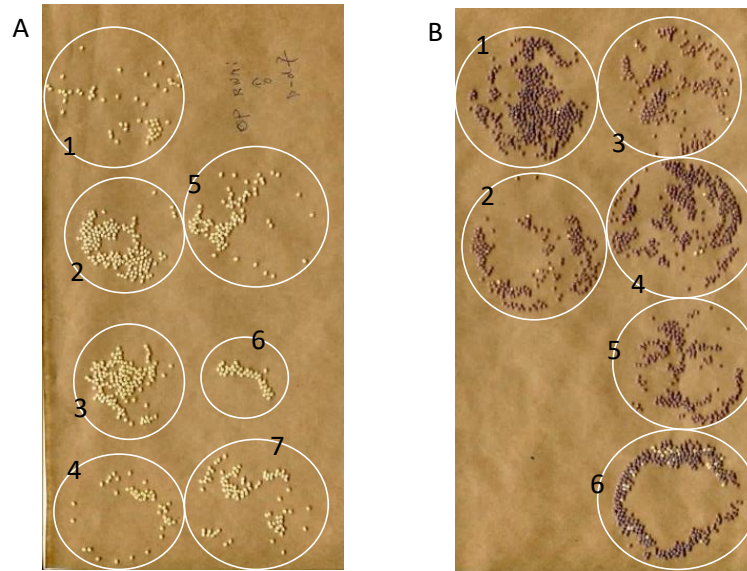

Figure 4

628  
629

630 Fig. 5 (A) Genomic organization of *nosP* locus. The nucleotide sequences in the vicinity of upstream  
631 and downstream TALEN target sites are shown. TALEN recognition sequences are underlined.  
632 (B) Nucleotide sequence of an edited allele used for phenotypic analyses. See text for details.

A

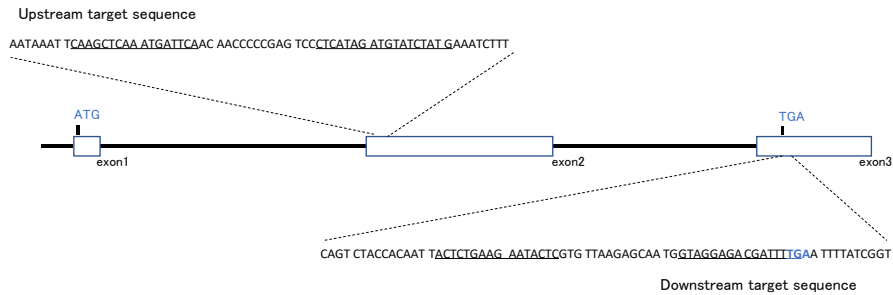

633

B

```

pnd TCAAATGATTCAACAACCCCGAGTCCCTCATAGATGTATCTATGAAATCTTTTATGAAAAGTATAATGAACTCCTAGTGCAGTACGACGCCATCGTCCAATATTTGG
      ↓ATATGATAGAGTCTATCTAT
20-6 TCAAATGATTCAACAAC-----GAGTCCCTCATAGATGTATCTATGAAATCTTTTATGAAAAGTATAATGAACTCCTAGTGCAGTACGACGCCATCGTCCAATATTTGG
    
```

Figure 5

634

635 Fig. 6 Genital organ morphologies of control male (A), female (C), *nosP*-edited male (B), and  
636 female (D) moths. The organ from the edited male lacks testis, which is present in wild-type male  
637 (arrows in A, whereas arrows in B indicate where testis should be attached). The organ from the  
638 edited female comprises empty ovarioles (D), whereas ovarioles from the wild females are full of  
639 mature oocytes(C). Interestingly, edited female individuals almost always contain a few developed  
640 oocytes (arrows in E). (F) is the magnified view of the distal end of *vas* deferens where the testis

641 (left arrow) is normally attached in wild-type (left-wild) with the right(edited) showing its absence  
642 (right arrow).

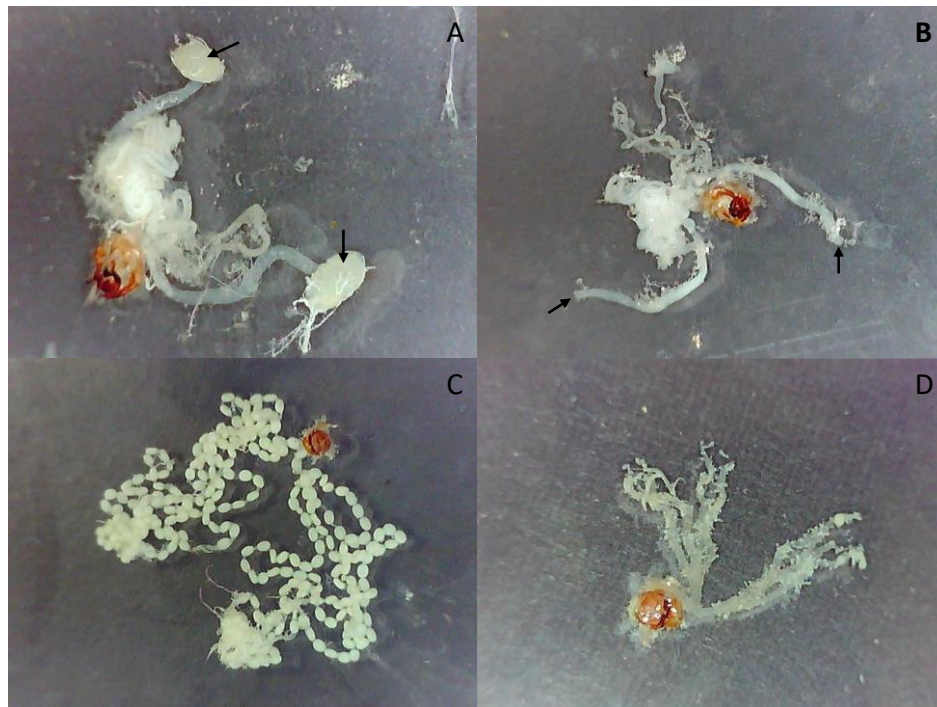

643  
644

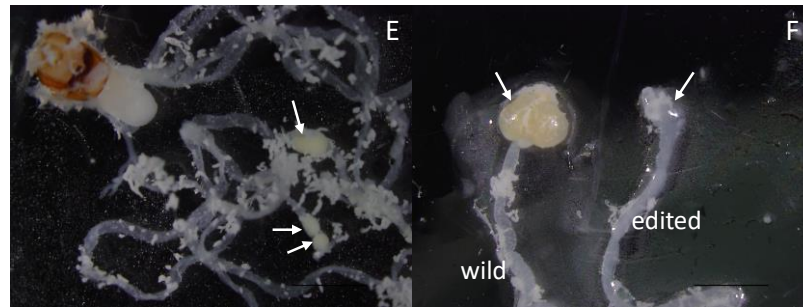

Figure 6

645  
646

647 Fig. 7 Loss of fertility of *nosP*-KO males and induction of spawning activity by copulation with  
648 wild-type male insect. Eggs were first spawned by female moths after mating with *nosP*-edited  
649 males (A, total of six pairs). Subsequently, the same females were mated with wild-type males and  
650 made them spawn eggs (B). Each circle in the photographs indicates eggs deposited by a single  
651 female moth as in Fig.4. As shown, while crosses with edited males produced a small number of  
652 sterile (uncolored) eggs, subsequent crosses with edited males produced a large number of fertilized  
653 (indicated by purple coloration) eggs, which suggest that copulation with wild-type males somehow  
654 stimulates spawning activity, which is absent in *nosP*-edited males.

655
